# Supplementary material for: Wolbachia-mediated resistance to Zika virus infection in Aedes aegypti is dominated by diverse transcriptional regulation and weak evolutionary pressures
Source: PubMed Central journal article supplement — bioRxiv. 2023 Jun 26:2023.06.26.546271. Preprint. [Version 1] doi: 10.1101/2023.06.26.546271 (PMC10327090; doi:10.1101/2023.06.26.546271), 2023-06-26
Supplement: media-2.pdf [file media-2.pdf]

**Table S1. Mosquito innate immune genes differentially expressed in COL.wMel relative to COL.tet.**

| Vectorbase ID | Gene Name | Product Description                                                              | GO term: CC                              | GO term: MF                                                                                             | GO term: BP                                   | Sample Group                    |
|---------------|-----------|----------------------------------------------------------------------------------|------------------------------------------|---------------------------------------------------------------------------------------------------------|-----------------------------------------------|---------------------------------|
| AAEL000037    | CLIPB35   | Clip-Domain Serine Protease family B.                                            | extracellular region                     | hydrolase activity;peptidase activity;serine-type endopeptidase activity;serine-type peptidase activity | proteolysis                                   | carcass_4, carcass_7            |
| AAEL000227    | SCRB8     | Class B Scavenger Receptor (CD36 domain).                                        | integral component of membrane;membrane  | N/A                                                                                                     | N/A                                           | carcass_4                       |
| AAEL000234    | SCRB7     | Class B Scavenger Receptor (CD36 domain).                                        | membrane                                 | N/A                                                                                                     | N/A                                           | carcass_4                       |
| AAEL000652    | GNBPA2    | Gram-Negative Binding Protein (GNBP) or Beta-1 3-Glucan Binding Protein (BGBP).  | N/A                                      | carbohydrate binding;hydrolase activity, hydrolyzing O-glycosyl compounds                               | carbohydrate metabolic process                | midgut_7                        |
| AAEL000726    | N/A       | fibrinogen and fibronectin                                                       | N/A                                      | N/A                                                                                                     | N/A                                           | carcass_7                       |
| AAEL000749    | N/A       | Angiotensin-like protein variant (Fragment) [Source:UniProtKB/TrEMBL;Acc:Q1HRV2] | N/A                                      | N/A                                                                                                     | N/A                                           | carcass_7                       |
| AAEL000760    | CLIPB30   | Clip-Domain Serine Protease family B.                                            | extracellular region                     | hydrolase activity;peptidase activity;serine-type endopeptidase activity;serine-type peptidase activity | proteolysis                                   | carcass_7                       |
| AAEL001401    | LRIM10A   | leucine-rich immune protein (Short)                                              | N/A                                      | protein binding                                                                                         | N/A                                           | carcass_4, carcass_7            |
| AAEL001402    | LRIM10B   | leucine-rich immune protein (Short)                                              | N/A                                      | protein binding                                                                                         | N/A                                           | carcass_4, carcass_7            |
| AAEL001414    | LRIM9     | leucine-rich immune protein (Short)                                              | N/A                                      | protein binding                                                                                         | N/A                                           | carcass_4, carcass_4, carcass_7 |
| AAEL001417    | LRIM7     | leucine-rich immune protein (Short)                                              | N/A                                      | protein binding                                                                                         | N/A                                           | carcass_4, carcass_7            |
| AAEL001420    | LRIM8     | leucine-rich immune protein (Short)                                              | N/A                                      | protein binding                                                                                         | N/A                                           | carcass_4, carcass_7            |
| AAEL001650    | N/A       | ML domain-containing protein [Source:UniProtKB/TrEMBL;Acc:A0A1S4ZF1]             | N/A                                      | N/A                                                                                                     | N/A                                           | midgut_7                        |
| AAEL001794    | N/A       | macroglobulin/complement                                                         | extracellular region;extracellular space | endopeptidase inhibitor activity                                                                        | negative regulation of endopeptidase activity | carcass_4, carcass_7            |
| AAEL002309    | TPX4      | Thioredoxin Peroxidase.                                                          | obsolete cell                            | antioxidant activity;oxidoreductas                                                                      | cell redox homeostasis;cellular               | midgut_7                        |

|            |          |                                                                           |                                          |                                                                                                             |                                                                                                             |                      |
|------------|----------|---------------------------------------------------------------------------|------------------------------------------|-------------------------------------------------------------------------------------------------------------|-------------------------------------------------------------------------------------------------------------|----------------------|
|            |          |                                                                           |                                          | e activity;peroxiredoxin activity                                                                           | oxidant detoxification;obsolete oxidation-reduction process                                                 |                      |
| AAEL002601 | CLIPA1   | Clip-Domain Serine Protease family A. Protease homologue.                 | N/A                                      | serine-type endopeptidase activity                                                                          | proteolysis                                                                                                 | carcass_4            |
| AAEL002720 | SRPN20   | Serine Protease Inhibitor (serpin) likely cleavage at V/V.                | extracellular space                      | N/A                                                                                                         | N/A                                                                                                         | carcass_4            |
| AAEL002731 | SRPN14   | Serine Protease Inhibitor (serpin) homologue - unlikely to be inhibitory. | extracellular space                      | N/A                                                                                                         | N/A                                                                                                         | carcass_4, carcass_7 |
| AAEL003156 | N/A      | fibrinogen and fibronectin                                                | N/A                                      | N/A                                                                                                         | N/A                                                                                                         | carcass_4            |
| AAEL003182 | SRPN26   | Serine Protease Inhibitor (serpin) homologue - unlikely to be inhibitory. | extracellular space                      | N/A                                                                                                         | N/A                                                                                                         | midgut_4             |
| AAEL003253 | CLIPB13B | Clip-Domain Serine Protease family B.                                     | N/A                                      | serine-type endopeptidase activity                                                                          | proteolysis                                                                                                 | carcass_4, carcass_7 |
| AAEL003294 | N/A      | fibrinogen and fibronectin                                                | N/A                                      | N/A                                                                                                         | N/A                                                                                                         | midgut_7             |
| AAEL003389 | ATT      | attacin anti-microbial peptide                                            | extracellular region;extracellular space | N/A                                                                                                         | antibacterial humoral response;defense response to bacterium                                                | carcass_4            |
| AAEL003439 | CASPS18  | caspase (short)                                                           | N/A                                      | cysteine-type endopeptidase activity;cysteine-type peptidase activity                                       | proteolysis                                                                                                 | midgut_7             |
| AAEL003444 | CASPS19  | caspase (short)                                                           | N/A                                      | cysteine-type endopeptidase activity;cysteine-type peptidase activity;hydrolase activity;peptidase activity | proteolysis                                                                                                 | midgut_7             |
| AAEL003631 | CLIPB41  | Clip-Domain Serine Protease family B.                                     | N/A                                      | hydrolase activity;peptidase activity;serine-type endopeptidase activity;serine-type peptidase activity     | proteolysis                                                                                                 | carcass_4            |
| AAEL003697 | SRPN17   | Serine Protease Inhibitor (serpin) homologue - unlikely to be inhibitory. | extracellular space                      | N/A                                                                                                         | N/A                                                                                                         | carcass_4, carcass_7 |
| AAEL003712 | LYSC10   | C-Type Lysozyme (Lys-E).                                                  | N/A                                      | lysozyme activity                                                                                           | N/A                                                                                                         | midgut_7             |
| AAEL003723 | LYSC11   | C-Type Lysozyme (Lys-A).                                                  | N/A                                      | lysozyme activity                                                                                           | N/A                                                                                                         | midgut_4             |
| AAEL004390 | HPX8B    | heme peroxidase                                                           | N/A                                      | heme binding;peroxidase activity                                                                            | cellular oxidant detoxification;obsolete oxidation-reduction process;oogenesis;response to oxidative stress | midgut_4             |

|            |         |                                                                           |                                         |                                                                                                         |                                                                                                  |                      |
|------------|---------|---------------------------------------------------------------------------|-----------------------------------------|---------------------------------------------------------------------------------------------------------|--------------------------------------------------------------------------------------------------|----------------------|
| AAEL004833 | N/A     | unspecified product                                                       | extracellular region                    | N/A                                                                                                     | defense response to bacterium                                                                    | carcass_4, carcass_4 |
| AAEL004978 | N/A     | DEAD box ATP-dependent RNA helicase                                       | N/A                                     | ATP binding;helicase activity;hydrolase activity;nucleic acid binding;nucleotide binding                | N/A                                                                                              | midgut_4             |
| AAEL004979 | CLIPD2  | Clip-Domain Serine Protease family D.                                     | N/A                                     | hydrolase activity;peptidase activity;serine-type endopeptidase activity;serine-type peptidase activity | proteolysis                                                                                      | carcass_4            |
| AAEL005108 | MNSOD2  | manganese-iron (Mn-Fe) superoxide dismutase                               | N/A                                     | metal ion binding;oxidoreductase activity;superoxide dismutase activity                                 | obsolete oxidation-reduction process;removal of superoxide radicals;superoxide metabolic process | carcass_4, carcass_7 |
| AAEL005293 | GALE8A  | Galectin [Source:UniProtKB/TrEMBL;Acc:Q16ND5]                             | N/A                                     | carbohydrate binding                                                                                    | N/A                                                                                              | midgut_7             |
| AAEL005482 | CTL18   | C-Type Lectin (CTL).                                                      | N/A                                     | carbohydrate binding                                                                                    | N/A                                                                                              | midgut_4             |
| AAEL005641 | CTLGA5  | C-Type Lectin (CTL) - galactose binding.                                  | N/A                                     | N/A                                                                                                     | N/A                                                                                              | midgut_7             |
| AAEL005956 | CASPS16 | caspase (short)                                                           | N/A                                     | cysteine-type endopeptidase activity;cysteine-type peptidase activity                                   | proteolysis                                                                                      | midgut_4, carcass_4  |
| AAEL006161 | CLIPB31 | Clip-Domain Serine Protease family B                                      | extracellular region                    | hydrolase activity;peptidase activity;serine-type endopeptidase activity;serine-type peptidase activity | proteolysis                                                                                      | carcass_4            |
| AAEL006355 | SCRC1   | Class C Scavenger Receptor (Sushi/SCR/CCP MAM and Somatomedin B domains). | integral component of membrane;membrane | N/A                                                                                                     | N/A                                                                                              | midgut_7             |
| AAEL006361 | SCRC2   | Class C Scavenger Receptor (Sushi/SCR/CCP MAM and Somatomedin B domains). | integral component of membrane;membrane | N/A                                                                                                     | N/A                                                                                              | midgut_4, midgut_7   |
| AAEL006377 | LRIM31  | leucine-rich immune protein (Coil-less)                                   | N/A                                     | protein binding                                                                                         | N/A                                                                                              | carcass_4            |
| AAEL006674 | CLIPB29 | Clip-Domain Serine Protease family B.                                     | extracellular region                    | hydrolase activity;peptidase activity;serine-type endopeptidase activity;serine-type peptidase activity | proteolysis                                                                                      | carcass_4            |
| AAEL006704 | N/A     | fibrinogen and fibronectin                                                | N/A                                     | N/A                                                                                                     | N/A                                                                                              | midgut_7             |
| AAEL006854 | N/A     | Niemann-Pick Type C-2, putative                                           | N/A                                     | N/A                                                                                                     | intracellular cholesterol transport                                                              | midgut_4, midgut_7   |
| AAEL007103 | LRIM15  | leucine-rich immune protein (TM)                                          | integral component of                   | protein binding                                                                                         | N/A                                                                                              | carcass_4            |

|            |         |                                                                                 |                                         |                                                                                                         |                                                                              |                      |
|------------|---------|---------------------------------------------------------------------------------|-----------------------------------------|---------------------------------------------------------------------------------------------------------|------------------------------------------------------------------------------|----------------------|
|            |         |                                                                                 | membrane;membrane                       |                                                                                                         |                                                                              |                      |
| AAEL007224 | LRIM22  | leucine-rich immune protein (Coil-less)                                         | N/A                                     | protein binding                                                                                         | N/A                                                                          | carcass_4, carcass_7 |
| AAEL007624 | REL2    | IMD pathway signalling NF-kappaB Relish-like transcription factor               | cytoplasm;host cell nucleus;nucleus     | DNA binding;DNA-binding transcription factor activity;protein binding                                   | regulation of transcription, DNA-templated                                   | midgut_7             |
| AAEL007696 | REL1A   | TOLL pathway signalling NF-kappaB Relish-like transcription factor              | cytoplasm;host cell nucleus;nucleus     | DNA binding;DNA-binding transcription factor activity                                                   | regulation of transcription, DNA-templated                                   | carcass_4, carcass_7 |
| AAEL007823 | N/A     | PIWI                                                                            | N/A                                     | nucleic acid binding;protein binding                                                                    | gene silencing by RNA                                                        | midgut_7             |
| AAEL007993 | CLIPB27 | Clip-Domain Serine Protease family B.                                           | extracellular region                    | hydrolase activity;peptidase activity;serine-type endopeptidase activity;serine-type peptidase activity | proteolysis                                                                  | midgut_4, midgut_7   |
| AAEL008098 | PIWI2   | PIWI                                                                            | N/A                                     | nucleic acid binding;protein binding                                                                    | gene silencing by RNA                                                        | midgut_4             |
| AAEL008370 | SCRB17  | Class B Scavenger Receptor (CD36 domain).                                       | integral component of membrane;membrane | N/A                                                                                                     | N/A                                                                          | carcass_4, carcass_7 |
| AAEL008658 | LRIM16  | leucine-rich immune protein (TM)                                                | integral component of membrane;membrane | protein binding                                                                                         | N/A                                                                          | midgut_4, midgut_7   |
| AAEL008668 | CLIPB22 | Clip-Domain Serine Protease family B.                                           | N/A                                     | serine-type endopeptidase activity                                                                      | proteolysis                                                                  | carcass_4            |
| AAEL009178 | GNNBP4  | Gram-Negative Binding Protein (GNBP) or Beta-1 3-Glucan Binding Protein (BGBP). | N/A                                     | hydrolase activity, hydrolyzing O-glycosyl compounds                                                    | carbohydrate metabolic process                                               | carcass_7            |
| AAEL009384 | N/A     | fibrinogen and fibronectin                                                      | N/A                                     | N/A                                                                                                     | N/A                                                                          | midgut_7             |
| AAEL009474 | PGRPS1  | Peptidoglycan Recognition Protein (Short)                                       | N/A                                     | N-acetylmuramoyl-L-alanine amidase activity;peptidoglycan binding;zinc ion binding                      | immune system process;innate immune response;peptidoglycan catabolic process | carcass_4            |
| AAEL009556 | N/A     | Niemann-Pick Type C-2, putative                                                 | N/A                                     | N/A                                                                                                     | intracellular cholesterol transport                                          | midgut_4, midgut_7   |
| AAEL009792 | LRIM25  | leucine-rich immune protein (Coil-less)                                         | N/A                                     | protein binding                                                                                         | N/A                                                                          | carcass_7            |
| AAEL009842 | GALE12  | Galectin [Source:UniProtKB/TrEMBL;Acc:Q16UP1]                                   | N/A                                     | N/A                                                                                                     | N/A                                                                          | midgut_4, midgut_7   |
| AAEL009850 | GALE14  | Galectin [Source:UniProtKB/TrEMBL;Acc:Q16UP0]                                   | N/A                                     | carbohydrate binding                                                                                    | N/A                                                                          | midgut_4, midgut_7   |

|            |         |                                                             |                                         |                                                              |                                      |                      |
|------------|---------|-------------------------------------------------------------|-----------------------------------------|--------------------------------------------------------------|--------------------------------------|----------------------|
| AAEL009894 | LRIM21  | leucine-rich immune protein (Coil-less)                     | integral component of membrane;membrane | protein binding                                              | N/A                                  | midgut_4, midgut_7   |
| AAEL010125 | LRIM17  | leucine-rich immune protein (Coil-less)                     | N/A                                     | protein binding                                              | N/A                                  | carcass_4            |
| AAEL010128 | LRIM4   | leucine-rich immune protein (Long)                          | N/A                                     | protein binding                                              | N/A                                  | carcass_4, carcass_7 |
| AAEL010132 | LRIM3   | leucine-rich immune protein (Long)                          | N/A                                     | protein binding                                              | N/A                                  | carcass_4            |
| AAEL010769 | SRPN6   | Serine Protease Inhibitor (serpin) likely cleavage at S/A.  | extracellular space                     | N/A                                                          | N/A                                  | carcass_7            |
| AAEL011009 | N/A     | fibrinogen and fibronectin                                  | N/A                                     | N/A                                                          | N/A                                  | carcass_4, carcass_7 |
| AAEL011407 | CTL20   | C-Type Lectin (CTL20)                                       | N/A                                     | N/A                                                          | N/A                                  | midgut_4             |
| AAEL011408 | CTL21   | C-Type Lectin (CTL21)                                       | N/A                                     | N/A                                                          | N/A                                  | carcass_4, carcass_7 |
| AAEL011453 | CTL14   | C-Type Lectin (CTL14)                                       | N/A                                     | N/A                                                          | N/A                                  | carcass_4, carcass_7 |
| AAEL011455 | CTLMA12 | C-Type Lectin (CTLMA12) - mannose binding                   | N/A                                     | carbohydrate binding                                         | N/A                                  | carcass_4            |
| AAEL011621 | CTLMA13 | C-Type Lectin (CTL) - mannose binding.                      | N/A                                     | carbohydrate binding;serine-type endopeptidase activity      | proteolysis                          | carcass_4, carcass_7 |
| AAEL011633 | N/A     | fibrinogen and fibronectin                                  | N/A                                     | N/A                                                          | N/A                                  | carcass_4            |
| AAEL011763 | PPO3    | prophenoxidase                                              | N/A                                     | metal ion binding;oxidoreductase activity                    | obsolete oxidation-reduction process | carcass_4            |
| AAEL011764 | PPO10   | prophenoxidase                                              | N/A                                     | metal ion binding;oxidoreductase activity                    | obsolete oxidation-reduction process | carcass_4, carcass_7 |
| AAEL012003 | GALE6B  | Galectin [Source:UniProtKB/TrEMBL;Acc:Q17AG2]               | N/A                                     | carbohydrate binding                                         | N/A                                  | midgut_7             |
| AAEL012086 | LRIM1   | leucine-rich immune protein (Long)                          | N/A                                     | protein binding                                              | N/A                                  | carcass_4, carcass_7 |
| AAEL012255 | LRIM13  | leucine-rich immune protein (Short)                         | N/A                                     | protein binding                                              | N/A                                  | carcass_4, carcass_7 |
| AAEL012380 | PGRPLA  | Peptidoglycan Recognition Protein (Long)                    | integral component of membrane;membrane | N-acetylmuramoyl-L-alanine amidase activity;zinc ion binding | peptidoglycan catabolic process      | midgut_4, midgut_7   |
| AAEL012471 | DOME    | JAKSTAT pathway signalling Transmembrane Receptor Domeless. | integral component of membrane;membrane | cytokine receptor activity;protein binding                   | cytokine-mediated signaling pathway  | midgut_7             |
| AAEL012763 | LRIM24  | leucine-rich immune protein (Coil-less)                     | N/A                                     | protein binding                                              | N/A                                  | carcass_4            |

|            |         |                                                                      |                                         |                                                                                                             |                                      |                                                                  |
|------------|---------|----------------------------------------------------------------------|-----------------------------------------|-------------------------------------------------------------------------------------------------------------|--------------------------------------|------------------------------------------------------------------|
| AAEL012767 | LRIM5   | leucine-rich immune protein (Short)                                  | N/A                                     | protein binding                                                                                             | N/A                                  | carcass_4                                                        |
| AAEL012911 | LRIM18  | leucine-rich immune protein (Coil-less)                              | integral component of membrane;membrane | protein binding                                                                                             | N/A                                  | carcass_4                                                        |
| AAEL013245 | CLIPB28 | Clip-Domain Serine Protease family B.                                | N/A                                     | peptidase activity;serine-type endopeptidase activity                                                       | proteolysis                          | carcass_7, carcass_7                                             |
| AAEL013417 | N/A     | fibrinogen and fibronectin                                           | N/A                                     | N/A                                                                                                         | N/A                                  | carcass_4                                                        |
| AAEL013496 | PPO8    | prophenoloxidase                                                     | N/A                                     | metal ion binding;oxidoreductase activity                                                                   | obsolete oxidation-reduction process | carcass_4                                                        |
| AAEL013692 | PIWI3   | PIWI                                                                 | N/A                                     | nucleic acid binding;protein binding                                                                        | gene silencing by RNA                | midgut_4                                                         |
| AAEL014348 | CASPS8  | caspase (short)                                                      | N/A                                     | cysteine-type endopeptidase activity;cysteine-type peptidase activity;hydrolase activity;peptidase activity | proteolysis                          | midgut_7, midgut_7                                               |
| AAEL014382 | CTLMA14 | C-Type Lectin (CTL) - mannose binding.                               | N/A                                     | carbohydrate binding                                                                                        | N/A                                  | carcass_4                                                        |
| AAEL014544 | PPO6    | prophenoloxidase                                                     | N/A                                     | metal ion binding;oxidoreductase activity                                                                   | obsolete oxidation-reduction process | carcass_4, carcass_7                                             |
| AAEL017536 | GRRP    | holotricin glycine rich repeat protein (GRRP) anti-microbial peptide | N/A                                     | N/A                                                                                                         | N/A                                  | carcass_4, carcass_4, carcass_4, carcass_7, carcass_7, carcass_7 |

CC, cellular component; MF, molecular function; BP, biological process.

**Table S2. Mosquito innate immune genes differentially expressed in COL.wMel relative to COL.tet during ZIKV infection.**

| Vectorbase ID | Gene Name | Product Description                                                             | GO term: CC                              | GO term: MF                                                                                             | GO term: BP                                                      | Sample Group                               |
|---------------|-----------|---------------------------------------------------------------------------------|------------------------------------------|---------------------------------------------------------------------------------------------------------|------------------------------------------------------------------|--------------------------------------------|
| AAEL000037    | CLIPB35   | Clip-Domain Serine Protease family B.                                           | extracellular region                     | hydrolase activity;peptidase activity;serine-type endopeptidase activity;serine-type peptidase activity | proteolysis                                                      | carcass_4                                  |
| AAEL000057    | TOLL5B    | Toll-like receptor                                                              | integral component of membrane;membrane  | protein binding                                                                                         | immune system process;innate immune response;signal transduction | carcass_4                                  |
| AAEL000227    | SCRB8     | Class B Scavenger Receptor (CD36 domain).                                       | integral component of membrane;membrane  | N/A                                                                                                     | N/A                                                              | carcass_4                                  |
| AAEL000234    | SCRB7     | Class B Scavenger Receptor (CD36 domain).                                       | membrane                                 | N/A                                                                                                     | N/A                                                              | carcass_7                                  |
| AAEL000652    | GNBPA2    | Gram-Negative Binding Protein (GNBP) or Beta-1 3-Glucan Binding Protein (BGBP). | N/A                                      | carbohydrate binding;hydrolase activity, hydrolyzing O-glycosyl compounds                               | carbohydrate metabolic process                                   | midgut_4                                   |
| AAEL000760    | CLIPB30   | Clip-Domain Serine Protease family B.                                           | extracellular region                     | hydrolase activity;peptidase activity;serine-type endopeptidase activity;serine-type peptidase activity | proteolysis                                                      | carcass_4                                  |
| AAEL001077    | CLIPB45   | Clip-Domain Serine Protease family B. Protease homologue.                       | N/A                                      | serine-type endopeptidase activity                                                                      | proteolysis                                                      | carcass_4, carcass_7                       |
| AAEL001401    | LRIM10A   | leucine-rich immune protein (Short)                                             | N/A                                      | protein binding                                                                                         | N/A                                                              | carcass_4                                  |
| AAEL001402    | LRIM10B   | leucine-rich immune protein (Short)                                             | N/A                                      | protein binding                                                                                         | N/A                                                              | carcass_4                                  |
| AAEL001414    | LRIM9     | leucine-rich immune protein (Short)                                             | N/A                                      | protein binding                                                                                         | N/A                                                              | carcass_4, carcass_4, carcass_7, carcass_7 |
| AAEL001417    | LRIM7     | leucine-rich immune protein (Short)                                             | N/A                                      | protein binding                                                                                         | N/A                                                              | carcass_4                                  |
| AAEL001420    | LRIM8     | leucine-rich immune protein (Short)                                             | N/A                                      | protein binding                                                                                         | N/A                                                              | carcass_4, carcass_7                       |
| AAEL001794    | N/A       | macroglobulin/complement                                                        | extracellular region;extracellular space | endopeptidase inhibitor activity                                                                        | negative regulation of endopeptidase activity                    | carcass_4                                  |
| AAEL002126    | CLIPA15   | Clip-Domain Serine Protease family A. Protease homologue.                       | N/A                                      | serine-type endopeptidase activity                                                                      | proteolysis                                                      | carcass_4                                  |
| AAEL002601    | CLIPA1    | Clip-Domain Serine Protease family A.                                           | N/A                                      | serine-type endopeptidase                                                                               | proteolysis                                                      | carcass_4                                  |

|            |          |                                                                                     |                      |                                                                                                         |                                                                                             |                      |
|------------|----------|-------------------------------------------------------------------------------------|----------------------|---------------------------------------------------------------------------------------------------------|---------------------------------------------------------------------------------------------|----------------------|
|            |          | Protease homologue.                                                                 |                      | activity                                                                                                |                                                                                             |                      |
| AAEL002720 | SRPN20   | Serine Protease Inhibitor (serpin) likely cleavage at V/V.                          | extracellular space  | N/A                                                                                                     | N/A                                                                                         | carcass_4            |
| AAEL002731 | SRPN14   | Serine Protease Inhibitor (serpin) homologue - unlikely to be inhibitory.           | extracellular space  | N/A                                                                                                     | N/A                                                                                         | carcass_4            |
| AAEL003253 | CLIPB13B | Clip-Domain Serine Protease family B.                                               | N/A                  | serine-type endopeptidase activity                                                                      | proteolysis                                                                                 | carcass_4            |
| AAEL003631 | CLIPB41  | Clip-Domain Serine Protease family B.                                               | N/A                  | hydrolase activity;peptidase activity;serine-type endopeptidase activity;serine-type peptidase activity | proteolysis                                                                                 | carcass_4, carcass_7 |
| AAEL003697 | SRPN17   | Serine Protease Inhibitor (serpin) homologue - unlikely to be inhibitory.           | extracellular space  | N/A                                                                                                     | N/A                                                                                         | carcass_4            |
| AAEL003832 | DEFC     | defensin anti-microbial peptide                                                     | extracellular region | N/A                                                                                                     | defense response;defense response to bacterium;immune system process;innate immune response | carcass_4            |
| AAEL003841 | DEFA     | Defensin-A [Source:UniProtKB/Swiss-Prot;Acc:P91793]                                 | N/A                  | N/A                                                                                                     | defense response                                                                            | carcass_4            |
| AAEL003857 | N/A      | INVERT_DEFENSINS domain-containing protein [Source:UniProtKB/TrEMBL;Acc:A0A1S4F676] | N/A                  | N/A                                                                                                     | defense response                                                                            | carcass_4            |
| AAEL004120 | N/A      | Niemann-Pick Type C-2, putative                                                     | N/A                  | N/A                                                                                                     | intracellular cholesterol transport                                                         | carcass_4            |
| AAEL004524 | CLIPC5B  | Clip-Domain Serine Protease family C.                                               | N/A                  | hydrolase activity;peptidase activity;serine-type endopeptidase activity;serine-type peptidase activity | proteolysis                                                                                 | carcass_4            |
| AAEL004833 | N/A      | unspecified product                                                                 | extracellular region | N/A                                                                                                     | defense response to bacterium                                                               | carcass_4            |
| AAEL004979 | CLIPD2   | Clip-Domain Serine Protease family D.                                               | N/A                  | hydrolase activity;peptidase activity;serine-type endopeptidase activity;serine-type peptidase activity | proteolysis                                                                                 | carcass_7            |
| AAEL005093 | CLIPB46  | Clip-Domain Serine Protease family B.                                               | extracellular region | hydrolase activity;peptidase activity;serine-type endopeptidase activity;serine-type peptidase activity | proteolysis                                                                                 | carcass_4            |
| AAEL005108 | MNSOD2   | manganese-iron (Mn-Fe) superoxide dismutase                                         | N/A                  | metal ion binding;oxidoreductase activity;superoxide                                                    | obsolete oxidation-reduction process;removal of                                             | carcass_4, carcass_7 |



|            |         |                                                                                 |                                         |                                                                                                         |                                                                              |                      |
|------------|---------|---------------------------------------------------------------------------------|-----------------------------------------|---------------------------------------------------------------------------------------------------------|------------------------------------------------------------------------------|----------------------|
|            |         |                                                                                 |                                         | dismutase activity                                                                                      | superoxide radicals;superoxide metabolic process                             |                      |
| AAEL005431 | CLIPB37 | Clip-Domain Serine Protease family B.                                           | N/A                                     | hydrolase activity;peptidase activity;serine-type endopeptidase activity;serine-type peptidase activity | proteolysis                                                                  | carcass_4            |
| AAEL005792 | CLIPB8  | Clip-Domain Serine Protease family E. Protease homologue.                       | N/A                                     | peptidase activity;serine-type endopeptidase activity                                                   | proteolysis                                                                  | carcass_4            |
| AAEL006161 | CLIPB31 | Clip-Domain Serine Protease family B                                            | extracellular region                    | hydrolase activity;peptidase activity;serine-type endopeptidase activity;serine-type peptidase activity | proteolysis                                                                  | carcass_7            |
| AAEL006377 | LRIM31  | leucine-rich immune protein (Coil-less)                                         | N/A                                     | protein binding                                                                                         | N/A                                                                          | carcass_4, carcass_7 |
| AAEL006674 | CLIPB29 | Clip-Domain Serine Protease family B.                                           | extracellular region                    | hydrolase activity;peptidase activity;serine-type endopeptidase activity;serine-type peptidase activity | proteolysis                                                                  | carcass_4            |
| AAEL007224 | LRIM22  | leucine-rich immune protein (Coil-less)                                         | N/A                                     | protein binding                                                                                         | N/A                                                                          | carcass_4, carcass_7 |
| AAEL007696 | REL1A   | TOLL pathway signalling NF-kappaB Relish-like transcription factor              | cytoplasm;host cell nucleus;nucleus     | DNA binding;DNA-binding transcription factor activity                                                   | regulation of transcription, DNA-templated                                   | carcass_4            |
| AAEL008370 | SCRB17  | Class B Scavenger Receptor (CD36 domain).                                       | integral component of membrane;membrane | N/A                                                                                                     | N/A                                                                          | carcass_4            |
| AAEL009178 | GNBPB4  | Gram-Negative Binding Protein (GNBP) or Beta-1 3-Glucan Binding Protein (BGBP). | N/A                                     | hydrolase activity, hydrolyzing O-glycosyl compounds                                                    | carbohydrate metabolic process                                               | carcass_7            |
| AAEL009420 | SCRBQ1  | Class B Scavenger Receptor (CD36 domain).                                       | integral component of membrane;membrane | N/A                                                                                                     | N/A                                                                          | carcass_7            |
| AAEL009474 | PGRPS1  | Peptidoglycan Recognition Protein (Short)                                       | N/A                                     | N-acetylmuramoyl-L-alanine amidase activity;peptidoglycan binding;zinc ion binding                      | immune system process;innate immune response;peptidoglycan catabolic process | carcass_4            |
| AAEL009842 | GALE12  | Galectin [Source:UniProtKB/TrEMBL;Acc:Q16UP1]                                   | N/A                                     | N/A                                                                                                     | N/A                                                                          | carcass_4            |
| AAEL010128 | LRIM4   | leucine-rich immune protein (Long)                                              | N/A                                     | protein binding                                                                                         | N/A                                                                          | carcass_4            |
| AAEL011009 | N/A     | fibrinogen and fibronectin                                                      | N/A                                     | N/A                                                                                                     | N/A                                                                          | carcass_4            |
| AAEL011407 | CTL20   | C-Type Lectin (CTL20)                                                           | N/A                                     | N/A                                                                                                     | N/A                                                                          | carcass_7            |

|            |         |                                               |                      |                                                                                                         |                                      |                                |
|------------|---------|-----------------------------------------------|----------------------|---------------------------------------------------------------------------------------------------------|--------------------------------------|--------------------------------|
| AAEL011408 | CTL21   | C-Type Lectin (CTL21)                         | N/A                  | N/A                                                                                                     | N/A                                  | carcass_4, carcass_7           |
| AAEL011453 | CTL14   | C-Type Lectin (CTL14)                         | N/A                  | N/A                                                                                                     | N/A                                  | carcass_4, carcass_7           |
| AAEL011455 | CTLMA12 | C-Type Lectin (CTLMA12) - mannose binding     | N/A                  | carbohydrate binding                                                                                    | N/A                                  | carcass_4                      |
| AAEL011621 | CTLMA13 | C-Type Lectin (CTL) - mannose binding.        | N/A                  | carbohydrate binding;serine-type endopeptidase activity                                                 | proteolysis                          | carcass_4, carcass_7           |
| AAEL011633 | N/A     | fibrinogen and fibronectin                    | N/A                  | N/A                                                                                                     | N/A                                  | carcass_4, carcass_7           |
| AAEL011634 | N/A     | fibrinogen and fibronectin                    | N/A                  | N/A                                                                                                     | N/A                                  | carcass_7                      |
| AAEL011763 | PPO3    | prophenoloxidase                              | N/A                  | metal ion binding;oxidoreductase activity                                                               | obsolete oxidation-reduction process | carcass_4, carcass_7           |
| AAEL011764 | PPO10   | prophenoloxidase                              | N/A                  | metal ion binding;oxidoreductase activity                                                               | obsolete oxidation-reduction process | carcass_4, carcass_7           |
| AAEL012086 | LRIM1   | leucine-rich immune protein (Long)            | N/A                  | protein binding                                                                                         | N/A                                  | carcass_4                      |
| AAEL012135 | GALE2   | Galectin [Source:UniProtKB/TrEMBL;Acc:Q16MZ7] | N/A                  | carbohydrate binding                                                                                    | N/A                                  | carcass_4                      |
| AAEL012255 | LRIM13  | leucine-rich immune protein (Short)           | N/A                  | protein binding                                                                                         | N/A                                  | midgut_7, carcass_4, carcass_7 |
| AAEL012410 | AGO1b   | eukaryotic translation initiation factor 2C   | N/A                  | nucleic acid binding;protein binding                                                                    | N/A                                  | midgut_4                       |
| AAEL012538 | LRIM6   | leucine-rich immune protein (Short)           | N/A                  | protein binding                                                                                         | N/A                                  | carcass_4, carcass_7           |
| AAEL012767 | LRIM5   | leucine-rich immune protein (Short)           | N/A                  | protein binding                                                                                         | N/A                                  | carcass_4                      |
| AAEL013245 | CLIPB28 | Clip-Domain Serine Protease family B.         | N/A                  | peptidase activity;serine-type endopeptidase activity                                                   | proteolysis                          | carcass_4, carcass_4           |
| AAEL013417 | N/A     | fibrinogen and fibronectin                    | N/A                  | N/A                                                                                                     | N/A                                  | carcass_7                      |
| AAEL013434 | N/A     | spaetzle-like cytokine                        | N/A                  | N/A                                                                                                     | N/A                                  | carcass_7                      |
| AAEL013496 | PPO8    | prophenoloxidase                              | N/A                  | metal ion binding;oxidoreductase activity                                                               | obsolete oxidation-reduction process | carcass_4, carcass_7           |
| AAEL013501 | PPO4    | prophenoloxidase                              | N/A                  | metal ion binding;oxidoreductase activity                                                               | obsolete oxidation-reduction process | carcass_4                      |
| AAEL014349 | CLIPB15 | Clip-Domain Serine Protease family B.         | extracellular region | hydrolase activity;peptidase activity;serine-type endopeptidase activity;serine-type peptidase activity | proteolysis                          | carcass_4                      |

|            |         |                                                                           |                     |                      |     |                                                       |
|------------|---------|---------------------------------------------------------------------------|---------------------|----------------------|-----|-------------------------------------------------------|
| AAEL014382 | CTLMA14 | C-Type Lectin (CTL) - mannose binding.                                    | N/A                 | carbohydrate binding | N/A | carcass_4                                             |
| AAEL017249 | SRPN24  | Serine Protease Inhibitor (serpin) homologue - unlikely to be inhibitory. | extracellular space | N/A                  | N/A | carcass_4                                             |
| AAEL017536 | GRRP    | holotricin glycine rich repeat protein (GRRP) anti-microbial peptide      | N/A                 | N/A                  | N/A | carcass_4, carcass_4, carcass_4, carcass_7, carcass_7 |

CC, cellular component; MF, molecular function; BP, biological process.

**Table S3. Genes differentially expressed in ZIKV-exposed COL.wMel carcasses 7dpf**

| Gene ID    | Product Description                                                    | Gene Name or Symbol |
|------------|------------------------------------------------------------------------|---------------------|
| AAEL000102 | unspecified product                                                    | N/A                 |
| AAEL000311 | unspecified product                                                    | N/A                 |
| AAEL000415 | AMP dependent coa ligase                                               | N/A                 |
| AAEL000566 | unspecified product                                                    | N/A                 |
| AAEL000658 | unspecified product                                                    | N/A                 |
| AAEL000859 | unspecified product                                                    | N/A                 |
| AAEL001062 | unspecified product                                                    | N/A                 |
| AAEL001091 | Malic enzyme [Source:UniProtKB/TrEMBL;Acc:A0A1S4EXR8]                  | N/A                 |
| AAEL001209 | sodium-dependent phosphate transporter                                 | N/A                 |
| AAEL001232 | tubulointerstitial nephritis antigen                                   | N/A                 |
| AAEL001293 | unspecified product                                                    | N/A                 |
| AAEL001307 | SEC14, putative                                                        | N/A                 |
| AAEL001818 | unspecified product                                                    | N/A                 |
| AAEL002378 | Carboxylic ester hydrolase<br>[Source:UniProtKB/TrEMBL;Acc:A0A0P6IY17] | N/A                 |
| AAEL002416 | short-chain dehydrogenase                                              | N/A                 |
| AAEL002467 | unspecified product                                                    | N/A                 |
| AAEL002796 | l-asparaginase i                                                       | N/A                 |
| AAEL002978 | leucyl aminopeptidase, putative                                        | N/A                 |
| AAEL003002 | unspecified product                                                    | N/A                 |
| AAEL003803 | unspecified product                                                    | N/A                 |
| AAEL004297 | ATP-citrate synthase                                                   | N/A                 |
| AAEL004941 | cytochrome P450                                                        | CYP6AK1             |
| AAEL004974 | beta-1,3-glucuronyltransferase s, p                                    | N/A                 |
| AAEL005147 | unspecified product                                                    | N/A                 |
| AAEL005199 | Carboxylic ester hydrolase<br>[Source:UniProtKB/TrEMBL;Acc:A0A1S4F9U8] | N/A                 |
| AAEL005256 | unspecified product                                                    | N/A                 |
| AAEL005293 | Galectin [Source:UniProtKB/TrEMBL;Acc:Q16ND5]                          | GALE8A              |
| AAEL005428 | unspecified product                                                    | N/A                 |
| AAEL005515 | heterogeneous nuclear ribonucleoprotein                                | N/A                 |
| AAEL005790 | malic enzyme                                                           | N/A                 |
| AAEL005992 | adam (a disintegrin and metalloprotease)                               | N/A                 |
| AAEL006721 | 2-oxoglutarate dehydrogenase                                           | N/A                 |
| AAEL006883 | unspecified product                                                    | N/A                 |
| AAEL007010 | cytochrome P450                                                        | CYP6AG4             |
| AAEL007029 | tropomodulin                                                           | N/A                 |
| AAEL007271 | basic helix-loop-helix zip transcription factor                        | N/A                 |
| AAEL007381 | unspecified product                                                    | N/A                 |
| AAEL007653 | allantoinase                                                           | N/A                 |
| AAEL007914 | discs large protein                                                    | N/A                 |

|            |                                                                                  |         |
|------------|----------------------------------------------------------------------------------|---------|
| AAEL009129 | cytochrome P450                                                                  | CYP6Z9  |
| AAEL009630 | high-affinity cgmp-specific 3,5-cyclic phosphodiesterase                         | N/A     |
| AAEL009645 | unspecified product                                                              | N/A     |
| AAEL010075 | oxidoreductase                                                                   | N/A     |
| AAEL010128 | leucine-rich immune protein (Long)                                               | LRIM4   |
| AAEL010366 | glucosyl/glucuronosyl transferases                                               | N/A     |
| AAEL010712 | low-density lipoprotein receptor (ldl)                                           | N/A     |
| AAEL011006 | guanylate kinase                                                                 | N/A     |
| AAEL011133 | unspecified product                                                              | N/A     |
| AAEL011161 | unspecified product                                                              | N/A     |
| AAEL012110 | protease m1 zinc metalloprotease                                                 | N/A     |
| AAEL012409 | pantothenate kinase                                                              | N/A     |
| AAEL012446 | Inhibitor of Apoptosis (IAP) containing Baculoviral IAP Repeat(s) (BIR domains). | IAP6    |
| AAEL012740 | ATPase subunit, putative                                                         | N/A     |
| AAEL013262 | unspecified product                                                              | N/A     |
| AAEL013347 | lethal(2)essential for life protein, l2efl                                       | N/A     |
| AAEL013349 | lethal(2)essential for life protein, l2efl                                       | N/A     |
| AAEL013431 | proline oxidase                                                                  | N/A     |
| AAEL013484 | unspecified product                                                              | N/A     |
| AAEL013662 | anterior fat body protein                                                        | N/A     |
| AAEL013812 | unspecified product                                                              | N/A     |
| AAEL013885 | unspecified product                                                              | N/A     |
| AAEL014303 | neuroigin,                                                                       | N/A     |
| AAEL014578 | ssm4 protein                                                                     | N/A     |
| AAEL014619 | cytochrome P450                                                                  | CYP9J22 |
| AAEL014863 | glycogenin                                                                       | N/A     |
| AAEL014999 | unspecified product                                                              | N/A     |
| AAEL017514 | unspecified product                                                              | N/A     |
| AAEL018117 | unspecified product                                                              | N/A     |
| AAEL018219 | unspecified product                                                              | N/A     |
| AAEL018668 | ATP synthase F0 subunit 6                                                        | ATP6    |
| AAEL018685 | cytochrome b                                                                     | CYTB    |
| AAEL019494 | unspecified product                                                              | N/A     |
| AAEL019495 | unspecified product                                                              | N/A     |
| AAEL019504 | unspecified product                                                              | N/A     |
| AAEL019639 | unspecified product                                                              | N/A     |
| AAEL019713 | unspecified product                                                              | N/A     |
| AAEL020524 | unspecified product                                                              | N/A     |
| AAEL020997 | pseudogene                                                                       | N/A     |
| AAEL021035 | unspecified product                                                              | N/A     |
| AAEL021471 | unspecified product                                                              | N/A     |
| AAEL021762 | unspecified product                                                              | N/A     |
| AAEL021861 | unspecified product                                                              | N/A     |
| AAEL022059 | pseudogene                                                                       | N/A     |

|                   |                     |     |
|-------------------|---------------------|-----|
| <b>AAEL023634</b> | unspecified product | N/A |
| <b>AAEL023799</b> | pseudogene          | N/A |
| <b>AAEL024512</b> | pseudogene          | N/A |
| <b>AAEL025488</b> | unspecified product | N/A |
| <b>AAEL027008</b> | unspecified product | N/A |
| <b>AAEL027243</b> | pseudogene          | N/A |
| <b>AAEL027593</b> | unspecified product | N/A |
| <b>AAEL027694</b> | unspecified product | N/A |
| <b>AAEL028635</b> | unspecified product | N/A |
| <b>AAEL029056</b> | unspecified product | N/A |

**Table S4. Genes differentially expressed in ZIKV-exposed COL.wMel midguts 7dpf**

| Gene ID    | Product Description                                                   | Gene Name or Symbol |
|------------|-----------------------------------------------------------------------|---------------------|
| AAEL000080 | phosphoenolpyruvate carboxykinase                                     | N/A                 |
| AAEL000128 | P130                                                                  | N/A                 |
| AAEL000271 | gamma-glutamyl hydrolase                                              | N/A                 |
| AAEL000294 | unspecified product                                                   | N/A                 |
| AAEL000323 | cysteine-rich venom protein, putative                                 | N/A                 |
| AAEL000416 | FHA domain-containing protein [Source:UniProtKB/TrEMBL;Acc:A0A1S4EV1] | N/A                 |
| AAEL000488 | unspecified product                                                   | N/A                 |
| AAEL000512 | Dynein heavy chain [Source:UniProtKB/TrEMBL;Acc:A0A1S4EW29]           | N/A                 |
| AAEL000566 | unspecified product                                                   | N/A                 |
| AAEL000636 | unspecified product                                                   | N/A                 |
| AAEL000713 | reticulon/nogo                                                        | N/A                 |
| AAEL000757 | anterior fat body protein                                             | N/A                 |
| AAEL000859 | unspecified product                                                   | N/A                 |
| AAEL000898 | unspecified product                                                   | N/A                 |
| AAEL000902 | sugar transporter                                                     | N/A                 |
| AAEL000905 | unspecified product                                                   | N/A                 |
| AAEL000923 | unspecified product                                                   | N/A                 |
| AAEL001062 | unspecified product                                                   | N/A                 |
| AAEL001209 | sodium-dependent phosphate transporter                                | N/A                 |
| AAEL001232 | tubulointerstitial nephritis antigen                                  | N/A                 |
| AAEL001254 | unspecified product                                                   | N/A                 |
| AAEL001421 | high density lipoprotein binding protein / vigilin                    | N/A                 |
| AAEL001434 | coronin                                                               | N/A                 |
| AAEL001511 | unspecified product                                                   | N/A                 |
| AAEL001532 | FAD NAD binding oxidoreductases                                       | N/A                 |
| AAEL001580 | otefin, putative                                                      | N/A                 |
| AAEL001632 | multicopper oxidase                                                   | N/A                 |
| AAEL001650 | ML domain-containing protein [Source:UniProtKB/TrEMBL;Acc:A0A1S4EZ1]  | N/A                 |
| AAEL001667 | multicopper oxidase                                                   | N/A                 |
| AAEL001749 | ventrithoid transmembrane protein, putative                           | N/A                 |
| AAEL001816 | glucosyl/glucuronosyl transferases                                    | N/A                 |
| AAEL001818 | unspecified product                                                   | N/A                 |
| AAEL001837 | Lipase [Source:UniProtKB/TrEMBL;Acc:A0A1S4EZ5]                        | N/A                 |

|            |                                                                                  |      |
|------------|----------------------------------------------------------------------------------|------|
| AAEL001900 | lactosylceramide 4-alpha-galactosyltransferase (alpha-1,4-galactosyltransferase) | N/A  |
| AAEL001905 | unspecified product                                                              | N/A  |
| AAEL001919 | protein tyrosine phosphatase, non-receptor type nt1                              | N/A  |
| AAEL001986 | kinesin-like protein KIF1B                                                       | N/A  |
| AAEL002036 | unspecified product                                                              | N/A  |
| AAEL002080 | septin interacting protein, putative                                             | N/A  |
| AAEL002102 | unspecified product                                                              | N/A  |
| AAEL002109 | unspecified product                                                              | N/A  |
| AAEL002130 | ecdysone inducible protein L2, putative                                          | N/A  |
| AAEL002176 | inosine-uridine preferring nucleoside hydrolase                                  | N/A  |
| AAEL002199 | unspecified product                                                              | N/A  |
| AAEL002235 | unspecified product                                                              | N/A  |
| AAEL002261 | GTP cyclohydrolase i                                                             | N/A  |
| AAEL002309 | Thioredoxin Peroxidase.                                                          | TPX4 |
| AAEL002467 | unspecified product                                                              | N/A  |
| AAEL002557 | cationic amino acid transporter                                                  | N/A  |
| AAEL002623 | unspecified product                                                              | N/A  |
| AAEL002652 | unspecified product                                                              | N/A  |
| AAEL002661 | Matrix metalloproteinase [Source:UniProtKB/TrEMBL;Acc:A0A1S4F2E2]                | N/A  |
| AAEL002671 | unspecified product                                                              | N/A  |
| AAEL002690 | beat protein                                                                     | N/A  |
| AAEL002714 | kinesin-like protein KIF23 (mitotic kinesin-like protein 1)                      | N/A  |
| AAEL002757 | unspecified product                                                              | N/A  |
| AAEL002796 | l-asparaginase i                                                                 | N/A  |
| AAEL002848 | tubulin beta chain                                                               | N/A  |
| AAEL002854 | F-box domain-containing protein [Source:UniProtKB/TrEMBL;Acc:A0A1S4F302]         | N/A  |
| AAEL002886 | thioredoxin reductase                                                            | N/A  |
| AAEL002919 | unspecified product                                                              | N/A  |
| AAEL002921 | unspecified product                                                              | N/A  |
| AAEL002978 | leucyl aminopeptidase, putative                                                  | N/A  |
| AAEL003051 | unspecified product                                                              | N/A  |
| AAEL003063 | Semaphorin [Source:UniProtKB/TrEMBL;Acc:A0A1S4F3R5]                              | N/A  |
| AAEL003294 | fibrinogen and fibronectin                                                       | N/A  |
| AAEL003317 | alkaline phosphatase                                                             | N/A  |
| AAEL003589 | transcription factor, putative                                                   | N/A  |
| AAEL003619 | sodium/chloride dependent amino acid transporter                                 | N/A  |



|            |                                                              |         |
|------------|--------------------------------------------------------------|---------|
| AAEL003681 | unspecified product                                          | N/A     |
| AAEL003712 | C-Type Lysozyme (Lys-E).                                     | LYSC10  |
| AAEL003950 | helicase                                                     | N/A     |
| AAEL003951 | unspecified product                                          | N/A     |
| AAEL004090 | unspecified product                                          | N/A     |
| AAEL004092 | deoxyribonuclease I, putative                                | N/A     |
| AAEL004126 | sterol desaturase                                            | N/A     |
| AAEL004206 | unspecified product                                          | N/A     |
| AAEL004212 | unspecified product                                          | N/A     |
| AAEL004302 | unspecified product                                          | N/A     |
| AAEL004310 | p15-2a protein, putative                                     | N/A     |
| AAEL004319 | epidermal growth factor receptor                             | N/A     |
| AAEL004386 | chorion peroxidase                                           | pxt     |
| AAEL004392 | IAP-antagonist Michelob_x-like Protein                       | IMP     |
| AAEL004520 | cAMP/cgmp cyclic nucleotide phosphodiesterase                | N/A     |
| AAEL004710 | spingomyelin synthetase                                      | N/A     |
| AAEL004729 | unspecified product                                          | N/A     |
| AAEL004868 | hemomucin                                                    | N/A     |
| AAEL004870 | cytochrome P450                                              | CYP18A1 |
| AAEL004964 | unspecified product                                          | N/A     |
| AAEL004981 | cation-transporting ATPase                                   | N/A     |
| AAEL005008 | aquaporin                                                    | N/A     |
| AAEL005071 | GTP binding protein [Source:UniProtKB/TrEMBL;Acc:A0A1S4F9G8] | N/A     |
| AAEL005255 | PAR-domain protein 1                                         | PDP1    |
| AAEL005342 | unspecified product                                          | N/A     |
| AAEL005347 | unspecified product                                          | N/A     |
| AAEL005417 | annexin x                                                    | N/A     |
| AAEL005428 | unspecified product                                          | N/A     |
| AAEL005432 | unspecified product                                          | N/A     |
| AAEL005455 | CTP synthase [Source:UniProtKB/TrEMBL;Acc:Q17A05]            | CTPsyn  |
| AAEL005503 | unspecified product                                          | N/A     |
| AAEL005666 | matrix metalloproteinase                                     | N/A     |
| AAEL005701 | retinaldehyde binding protein                                | N/A     |
| AAEL005704 | unspecified product                                          | N/A     |
| AAEL005791 | unspecified product                                          | N/A     |
| AAEL005839 | uridine phosphorylase                                        | N/A     |
| AAEL005977 | chondroitin 4-sulfotransferase                               | N/A     |

|            |                                                                                      |         |
|------------|--------------------------------------------------------------------------------------|---------|
| AAEL005992 | adam (a disintegrin and metalloprotease)                                             | N/A     |
| AAEL006028 | unspecified product                                                                  | N/A     |
| AAEL006034 | Vanin-like protein 1 precursor, putative                                             | N/A     |
| AAEL006054 | peptidyl-prolyl cis-trans isomerase (cyclophilin)                                    | N/A     |
| AAEL006171 | n-myc downstream regulated                                                           | N/A     |
| AAEL006216 | unspecified product                                                                  | N/A     |
| AAEL006277 | unspecified product                                                                  | N/A     |
| AAEL006321 | 1-acylglycerol-3-phosphate acyltransferase<br>[Source:UniProtKB/TrEMBL;Acc:Q176M5]   | N/A     |
| AAEL006355 | Class C Scavenger Receptor (Sushi/SCR/CCP MAM and Somatomedin B domains).            | SCRC1   |
| AAEL006361 | Class C Scavenger Receptor (Sushi/SCR/CCP MAM and Somatomedin B domains).            | SCRC2   |
| AAEL006449 | ser/thr protein kinase-lyk4                                                          | N/A     |
| AAEL006480 | unspecified product                                                                  | N/A     |
| AAEL006518 | cytidine deaminase, putative                                                         | N/A     |
| AAEL006663 | ANK_REP_REGION domain-containing protein<br>[Source:UniProtKB/TrEMBL;Acc:A0A1S4FEA3] | N/A     |
| AAEL006686 | unspecified product                                                                  | N/A     |
| AAEL006708 | hedgehog                                                                             | N/A     |
| AAEL006723 | unspecified product                                                                  | N/A     |
| AAEL006809 | voltage-gated ion channel                                                            | N/A     |
| AAEL006902 | serine-type enodpeptidase,                                                           | N/A     |
| AAEL006921 | calmodulin                                                                           | N/A     |
| AAEL006978 | protein-glutamine gamma-glutamyltransferase                                          | N/A     |
| AAEL007004 | GPCR Bride of Sevenless Family                                                       | GPRBOS1 |
| AAEL007018 | udp-glucose 4-epimerase                                                              | N/A     |
| AAEL007030 | ceramidase                                                                           | N/A     |
| AAEL007097 | 4-nitrophenylphosphatase [Source:UniProtKB/TrEMBL;Acc:Q0IF18]                        | N/A     |
| AAEL007120 | lim homeobox protein                                                                 | N/A     |
| AAEL007191 | amino acid transporter                                                               | N/A     |
| AAEL007208 | unspecified product                                                                  | N/A     |
| AAEL007238 | DUF3421 domain-containing protein<br>[Source:UniProtKB/TrEMBL;Acc:A0A1S4FG14]        | N/A     |
| AAEL007258 | unspecified product                                                                  | N/A     |
| AAEL007271 | basic helix-loop-helix zip transcription factor                                      | N/A     |
| AAEL007299 | Cadherin, putative [Source:UniProtKB/TrEMBL;Acc:A0A1S4FG21]                          | N/A     |
| AAEL007344 | LITAF domain-containing protein [Source:UniProtKB/TrEMBL;Acc:A0A1S4FG64]             | N/A     |
| AAEL007547 | chloride channel protein                                                             | N/A     |

|            |                                                                                   |         |
|------------|-----------------------------------------------------------------------------------|---------|
| AAEL007560 | core 1 udp-galactose:n-acetylgalactosamine-alpha-r beta 1,3-galactosyltransferase | N/A     |
| AAEL007657 | low-density lipoprotein receptor (ldl)                                            | N/A     |
| AAEL007765 | Serine Protease Inhibitor (serpin) likely cleavage at K/R. Transcript A.          | SRPN10  |
| AAEL007778 | leucine-rich transmembrane protein                                                | N/A     |
| AAEL007872 | unspecified product                                                               | N/A     |
| AAEL007880 | ornithine decarboxylase                                                           | N/A     |
| AAEL007942 | fibrinogen and fibronectin                                                        | N/A     |
| AAEL007993 | Clip-Domain Serine Protease family B.                                             | CLIPB27 |
| AAEL008024 | unspecified product                                                               | N/A     |
| AAEL008027 | unspecified product                                                               | N/A     |
| AAEL008028 | monocarboxylate transporter                                                       | N/A     |
| AAEL008097 | trypsin-eta, putative                                                             | N/A     |
| AAEL008141 | period circadian protein                                                          | PER     |
| AAEL008267 | GPCR Neurokinin/Tachykinin Family                                                 | GPRNPR5 |
| AAEL008306 | mitogen activated protein kinase kinase kinase 5, mapkkk5, mekk5                  | N/A     |
| AAEL008346 | achaete-scute complex protein T3, putative                                        | N/A     |
| AAEL008467 | cysteine synthase                                                                 | N/A     |
| AAEL008468 | cysteine synthase                                                                 | N/A     |
| AAEL008473 | cysteine-rich venom protein, putative                                             | N/A     |
| AAEL008511 | unspecified product                                                               | N/A     |
| AAEL008547 | unspecified product                                                               | N/A     |
| AAEL008622 | jnk                                                                               | N/A     |
| AAEL008655 | GPCR Vasopressin Family                                                           | GPRVPR2 |
| AAEL008658 | leucine-rich immune protein (TM)                                                  | LRIM16  |
| AAEL008760 | unspecified product                                                               | N/A     |
| AAEL008767 | serine protease                                                                   | N/A     |
| AAEL008782 | serine-type endopeptidase,                                                        | N/A     |
| AAEL008829 | unspecified product                                                               | N/A     |
| AAEL008832 | forkhead box protein (AegFOXN1)                                                   | N/A     |
| AAEL008843 | unspecified product                                                               | N/A     |
| AAEL008910 | unspecified product                                                               | N/A     |
| AAEL008916 | unspecified product                                                               | N/A     |
| AAEL008921 | myosin regulatory light chain 2 smooth muscle                                     | N/A     |
| AAEL008953 | unspecified product                                                               | N/A     |
| AAEL009070 | unspecified product                                                               | N/A     |
| AAEL009114 | unspecified product                                                               | N/A     |
| AAEL009185 | arginine or creatine kinase                                                       | N/A     |

|            |                                                                   |          |
|------------|-------------------------------------------------------------------|----------|
| AAEL009249 | Coronin [Source:UniProtKB/TrEMBL;Acc:A0A1S4FM51]                  | N/A      |
| AAEL009317 | rab11                                                             | N/A      |
| AAEL009333 | unspecified product                                               | N/A      |
| AAEL009371 | unspecified product                                               | N/A      |
| AAEL009556 | Niemann-Pick Type C-2, putative                                   | N/A      |
| AAEL009645 | unspecified product                                               | N/A      |
| AAEL009681 | Putative rhomboid family [Source:UniProtKB/TrEMBL;Acc:A0A0P6IZ43] | N/A      |
| AAEL009762 | cytochrome P450                                                   | CYP307A1 |
| AAEL009813 | glutamate receptor 7 (ampa)                                       | N/A      |
| AAEL009842 | Galectin [Source:UniProtKB/TrEMBL;Acc:Q16UP1]                     | GALE12   |
| AAEL009850 | Galectin [Source:UniProtKB/TrEMBL;Acc:Q16UP0]                     | GALE14   |
| AAEL009987 | unspecified product                                               | N/A      |
| AAEL010050 | unspecified product                                               | N/A      |
| AAEL010075 | oxidoreductase                                                    | N/A      |
| AAEL010084 | unspecified product                                               | N/A      |
| AAEL010094 | cyclin b                                                          | N/A      |
| AAEL010145 | sodium/potassium-dependent ATPase beta-2 subunit                  | N/A      |
| AAEL010264 | unspecified product                                               | N/A      |
| AAEL010270 | unspecified product                                               | N/A      |
| AAEL010375 | unspecified product                                               | N/A      |
| AAEL010477 | unspecified product                                               | N/A      |
| AAEL010483 | oxysterol-binding protein related protein (ORP8)                  | ORP8     |
| AAEL010650 | sodium/solute symporter                                           | N/A      |
| AAEL010661 | phospholipid scramblase 1,                                        | N/A      |
| AAEL010678 | unspecified product                                               | N/A      |
| AAEL010738 | sodium bicarbonate cotransporter                                  | N/A      |
| AAEL010776 | carboxypeptidase                                                  | N/A      |
| AAEL010782 | carboxypeptidase                                                  | N/A      |
| AAEL010840 | unspecified product                                               | N/A      |
| AAEL010932 | RNAse h                                                           | N/A      |
| AAEL010956 | unspecified product                                               | N/A      |
| AAEL011009 | fibrinogen and fibronectin                                        | N/A      |
| AAEL011203 | unspecified product                                               | N/A      |
| AAEL011264 | phosphatidylethanolamine-binding protein                          | N/A      |
| AAEL011424 | Histone H3 [Source:UniProtKB/TrEMBL;Acc:A0A1S4FTJ0]               | N/A      |
| AAEL011510 | multiple inositol polyphosphate phosphatase                       | N/A      |
| AAEL011598 | Gustatory receptor [Source:UniProtKB/TrEMBL;Acc:A0A1S4FU22]       | N/A      |

|            |                                                                                    |         |
|------------|------------------------------------------------------------------------------------|---------|
| AAEL011648 | cyclin d                                                                           | N/A     |
| AAEL011650 | coatomer, gamma-subunit, putative                                                  | N/A     |
| AAEL011653 | thyroid hormone receptor interactor                                                | N/A     |
| AAEL011901 | 1-acyl-sn-glycerol-3-phosphate acyltransferase                                     | N/A     |
| AAEL011937 | glucosyl/glucuronosyl transferases                                                 | N/A     |
| AAEL012003 | Galectin [Source:UniProtKB/TrEMBL;Acc:Q17AG2]                                      | GALE6B  |
| AAEL012014 | L-lactate dehydrogenase [Source:UniProtKB/TrEMBL;Acc:Q16ND1]                       | N/A     |
| AAEL012052 | unspecified product                                                                | N/A     |
| AAEL012062 | Na <sup>+</sup> /K <sup>+</sup> ATPase alpha subunit                               | N/A     |
| AAEL012349 | lipase 1 precursor                                                                 | N/A     |
| AAEL012390 | unspecified product                                                                | N/A     |
| AAEL012410 | eukaryotic translation initiation factor 2C                                        | AGO1b   |
| AAEL012499 | Histone H2A [Source:UniProtKB/TrEMBL;Acc:Q16LW9]                                   | N/A     |
| AAEL012514 | translation initiation factor 2b, delta subunit                                    | N/A     |
| AAEL012522 | Sodium-dependent phosphate transporter<br>[Source:UniProtKB/TrEMBL;Acc:A0A1S4FWV3] | N/A     |
| AAEL012545 | Proliferating cell nuclear antigen [Source:UniProtKB/TrEMBL;Acc:Q4PKD7]            | N/A     |
| AAEL012629 | deoxyuridine 5'-triphosphate nucleotidohydrolase                                   | N/A     |
| AAEL012859 | unspecified product                                                                | N/A     |
| AAEL012960 | importin alpha                                                                     | N/A     |
| AAEL013111 | glutamate transporter                                                              | N/A     |
| AAEL013262 | unspecified product                                                                | N/A     |
| AAEL013276 | acid phosphatase                                                                   | N/A     |
| AAEL013304 | unspecified product                                                                | N/A     |
| AAEL013309 | high-affinity copper uptake protein                                                | N/A     |
| AAEL013345 | alphaA-crystallin, putative                                                        | N/A     |
| AAEL013346 | lethal(2)essential for life protein, l2efl                                         | N/A     |
| AAEL013348 | lethal(2)essential for life protein, l2efl                                         | N/A     |
| AAEL013349 | lethal(2)essential for life protein, l2efl                                         | N/A     |
| AAEL013350 | heat shock protein 26kD, putative                                                  | N/A     |
| AAEL013351 | lethal(2)essential for life protein, l2efl                                         | N/A     |
| AAEL013352 | lethal(2)essential for life protein, l2efl                                         | N/A     |
| AAEL013692 | PIWI                                                                               | PIWI3   |
| AAEL013713 | trypsin                                                                            | N/A     |
| AAEL013780 | unspecified product                                                                | N/A     |
| AAEL013808 | fascin                                                                             | N/A     |
| AAEL013875 | tetraspanin, putative                                                              | N/A     |
| AAEL014019 | cytochrome P450                                                                    | CYP4J16 |

|                   |                                                                                  |         |
|-------------------|----------------------------------------------------------------------------------|---------|
| <b>AAEL014226</b> | unspecified product                                                              | N/A     |
| <b>AAEL014251</b> | Inhibitor of Apoptosis (IAP) containing Baculoviral IAP Repeat(s) (BIR domains). | IAP5    |
| <b>AAEL014348</b> | caspase (short)                                                                  | CASPS8  |
| <b>AAEL014363</b> | unspecified product                                                              | N/A     |
| <b>AAEL014408</b> | m-phase inducer phosphatase(cdc25)                                               | N/A     |
| <b>AAEL014439</b> | juvenile hormone-inducible protein, putative                                     | N/A     |
| <b>AAEL014454</b> | unspecified product                                                              | N/A     |
| <b>AAEL014541</b> | maltose phosphorylase                                                            | N/A     |
| <b>AAEL014567</b> | oviductin                                                                        | N/A     |
| <b>AAEL014945</b> | unspecified product                                                              | N/A     |
| <b>AAEL014981</b> | unspecified product                                                              | N/A     |
| <b>AAEL016975</b> | unspecified product                                                              | N/A     |
| <b>AAEL017331</b> | unspecified product                                                              | N/A     |
| <b>AAEL017553</b> | Carboxy/choline esterase Alpha Esterase                                          | CCEAE2B |
| <b>AAEL018039</b> | unspecified product                                                              | N/A     |
| <b>AAEL018118</b> | unspecified product                                                              | N/A     |
| <b>AAEL018120</b> | Ribosomal protein S6 kinase [Source:UniProtKB/TrEMBL;Acc:Q535V4]                 | N/A     |
| <b>AAEL019504</b> | unspecified product                                                              | N/A     |
| <b>AAEL019536</b> | unspecified product                                                              | N/A     |
| <b>AAEL019604</b> | unspecified product                                                              | N/A     |
| <b>AAEL019610</b> | unspecified product                                                              | N/A     |
| <b>AAEL019623</b> | unspecified product                                                              | N/A     |
| <b>AAEL019677</b> | unspecified product                                                              | N/A     |
| <b>AAEL019681</b> | unspecified product                                                              | N/A     |
| <b>AAEL019700</b> | unspecified product                                                              | N/A     |
| <b>AAEL019712</b> | unspecified product                                                              | N/A     |
| <b>AAEL019722</b> | unspecified product                                                              | N/A     |
| <b>AAEL019728</b> | suppressor of cytokine signaling                                                 | SOCS    |
| <b>AAEL019785</b> | unspecified product                                                              | N/A     |
| <b>AAEL019793</b> | unspecified product                                                              | N/A     |
| <b>AAEL019902</b> | unspecified product                                                              | N/A     |
| <b>AAEL019903</b> | unspecified product                                                              | N/A     |
| <b>AAEL019940</b> | unspecified product                                                              | N/A     |
| <b>AAEL019941</b> | unspecified product                                                              | N/A     |
| <b>AAEL020654</b> | unspecified product                                                              | N/A     |
| <b>AAEL020729</b> | unspecified product                                                              | N/A     |
| <b>AAEL020800</b> | unspecified product                                                              | N/A     |

|                   |                                                         |     |
|-------------------|---------------------------------------------------------|-----|
| <b>AAEL021278</b> | unspecified product                                     | N/A |
| <b>AAEL021318</b> | unspecified product                                     | N/A |
| <b>AAEL021321</b> | unspecified product                                     | N/A |
| <b>AAEL021899</b> | unspecified product                                     | N/A |
| <b>AAEL021925</b> | unspecified product                                     | N/A |
| <b>AAEL021931</b> | unspecified product                                     | N/A |
| <b>AAEL022048</b> | unspecified product                                     | N/A |
| <b>AAEL022059</b> | pseudogene                                              | N/A |
| <b>AAEL022167</b> | unspecified product                                     | N/A |
| <b>AAEL022628</b> | unspecified product                                     | N/A |
| <b>AAEL022659</b> | unspecified product                                     | N/A |
| <b>AAEL023231</b> | unspecified product                                     | N/A |
| <b>AAEL023478</b> | unspecified product                                     | N/A |
| <b>AAEL023490</b> | unspecified product                                     | N/A |
| <b>AAEL023644</b> | unspecified product                                     | N/A |
| <b>AAEL023746</b> | unspecified product                                     | N/A |
| <b>AAEL024003</b> | unspecified product                                     | N/A |
| <b>AAEL024222</b> | unspecified product                                     | N/A |
| <b>AAEL024370</b> | unspecified product                                     | N/A |
| <b>AAEL024512</b> | pseudogene                                              | N/A |
| <b>AAEL024520</b> | unspecified product                                     | N/A |
| <b>AAEL024558</b> | unspecified product                                     | N/A |
| <b>AAEL024675</b> | unspecified product                                     | N/A |
| <b>AAEL024880</b> | unspecified product                                     | N/A |
| <b>AAEL024913</b> | unspecified product                                     | N/A |
| <b>AAEL024940</b> | unspecified product                                     | N/A |
| <b>AAEL025091</b> | unspecified product                                     | N/A |
| <b>AAEL025226</b> | unspecified product                                     | N/A |
| <b>AAEL025432</b> | Cytidine deaminase [Source:UniProtKB/TrEMBL;Acc:Q0IF52] | N/A |
| <b>AAEL025530</b> | unspecified product                                     | N/A |
| <b>AAEL025658</b> | unspecified product                                     | N/A |
| <b>AAEL025718</b> | unspecified product                                     | N/A |
| <b>AAEL025818</b> | unspecified product                                     | N/A |
| <b>AAEL025839</b> | unspecified product                                     | N/A |
| <b>AAEL026025</b> | unspecified product                                     | N/A |
| <b>AAEL026215</b> | unspecified product                                     | N/A |
| <b>AAEL026343</b> | unspecified product                                     | N/A |

|                   |                     |      |
|-------------------|---------------------|------|
| <b>AAEL026466</b> | unspecified product | N/A  |
| <b>AAEL026744</b> | unspecified product | N/A  |
| <b>AAEL026751</b> | unspecified product | N/A  |
| <b>AAEL026981</b> | unspecified product | N/A  |
| <b>AAEL027019</b> | unspecified product | N/A  |
| <b>AAEL027398</b> | unspecified product | N/A  |
| <b>AAEL027593</b> | unspecified product | N/A  |
| <b>AAEL027610</b> | unspecified product | N/A  |
| <b>AAEL027937</b> | unspecified product | N/A  |
| <b>AAEL028005</b> | unspecified product | N/A  |
| <b>AAEL028021</b> | unspecified product | N/A  |
| <b>AAEL028048</b> | unspecified product | N/A  |
| <b>AAEL028088</b> | unspecified product | N/A  |
| <b>AAEL028635</b> | unspecified product | N/A  |
| <b>AAEL029041</b> | unspecified product | N/A  |
| <b>AAEL029044</b> | cecropin            | CECE |
| <b>AAEL029046</b> | cecropin            | CECD |
| <b>AAEL029082</b> | unspecified product | N/A  |
| <b>AAEL029104</b> | unspecified product | N/A  |
| <b>AAEL029107</b> | unspecified product | N/A  |
